# Supplementary material for: Biomarker Profiles in Heart Failure Patients With Preserved and Reduced Ejection Fraction
Source: PubMed Central journal article supplement — J Am Heart Assoc. 2017 Mar 30;6(4):e003989. doi: 10.1161/JAHA.116.003989 (PMC5532986; doi:10.1161/jaha.116.003989), 2017-03-30

# **Supplemental Material**

**Table S1. Differences between entire cohort and subcohort**

|                                        | Total cohort (n=1023) | Sub cohort (n=460) |
|----------------------------------------|-----------------------|--------------------|
| <b>Treatment allocation</b>            |                       |                    |
| Control group                          | 33                    | 32,2               |
| Basic support                          | 33,3                  | 32,4               |
| Intensive support                      | 33,6                  | 35,4               |
| <b>Demographics and clinical signs</b> |                       |                    |
| Age (years)                            | 70.8 ± 11             | 70.6 ± 11.1        |
| Female sex (%)                         | 37,5                  | 37,4               |
| BMI (kg/m <sup>2</sup> )               | 26.9 ± 5.3            | 27.0 ± 5.6         |
| Systolic BP (mmHg)                     | 118.3 ± 21.0          | 117.9 ± 21.3       |
| Heart rate (bpm)                       | 74.6 ± 13.4           | 74.2 ± 13.4        |
| LVEF (%)                               | 33.7 ± 14.4           | 32.5 ± 14.0        |
| Previous HF hospitalization            | 32,7                  | 33,7               |
| NYHA class, II/III/IV (%)              | 50.9/45.7/3.4         | 44/52/4            |
| <b>Medical history (%)</b>             |                       |                    |
| Myocardial infarction                  | 42,6                  | 40,7               |
| Stroke                                 | 16                    | 14,8               |
| Hypertension                           | 42,9                  | 41,5               |
| Atrial fibrillation of flutter         | 44                    | 45,4               |
| Diabetes                               | 29,3                  | 29,3               |
| COPD                                   | 26,2                  | 28,3               |
| <b>Laboratory</b>                      |                       |                    |
| Hemoglobin (g/dL)                      | 13.1 ± 2.0            | 13.2 ± 2.1         |
| Sodium (mmol/L)                        | 139 ± 4               | 138.6 ± 4.3        |
| Creatinine (μmol/L)                    | 125.0 ± 53            | 125.7 ± 52.8       |
| eGFR (mL/min/1.73m <sup>2</sup> )      | 55.2 ± 21.1           | 54.9 ± 20.5        |
| BUN (mmol/L)                           | 10.7 (8.1 - 15.2)     | 11.0 (8.2 - 15.5)  |
| <b>Treatment at discharge (%)</b>      |                       |                    |
| ACE inhibitor or ARB                   | 82,8                  | 82,2               |
| Beta blocker                           | 66,2                  | 67,8               |
| Diuretic                               | 95,8                  | 95,7               |
| MRA                                    | 54,1                  | 56,3               |
| Statin                                 | 37,9                  | 39,8               |
| Digoxin                                | 30,2                  | 33,7               |

Abbreviations: ACE, angiotensin converting enzyme; ARB, angiotensin II receptor blocker; BMI, body mass index; BP, blood pressure; COPD, chronic obstructive pulmonary disease; eGFR, estimated glomerular filtration rate; HF, heart failure; HFpEF, heart failure with a preserved ejection fraction; HFrEF, heart failure with a reduced ejection fraction; NYHA, New York heart association.

**Table S2. Biomarker assay data.**

| Biomarker      | Intra Assay %CV | Inter Assay |  | Low Cutoff | High Cutoff | Units |
|----------------|-----------------|-------------|--|------------|-------------|-------|
|                |                 | %CV         |  |            |             |       |
| LTBR           | 13%             | 13%         |  | 0,028      | 45          | ng/mL |
| Mesothelin     | 12%             | 12%         |  | 6,1        | 120         | ng/mL |
| MPO            | 15%             | 14%         |  | 2          | 800         | ng/mL |
| Neuropilin 1   | 14%             | 15%         |  | 1          | 900         | ng/mL |
| Osteopontin    | 21%             | 22%         |  | 2,5        | 2500        | ng/mL |
| Pentraxin 3    | 10%             | 11%         |  | 0,07       | 150         | ng/mL |
| Periostin      | 12%             | 12%         |  | 2,3        | 1921        | ng/mL |
| PIGR           | 16%             | 16%         |  | 12         | 2341        | ng/mL |
| PSAP-B         | 14%             | 16%         |  | 2          | 530         | ng/mL |
| ST-2           | 9%              | 10%         |  | 0,28       | 380         | ng/mL |
| Syndecan-1     | 25%             | 24%         |  | 2,4        | 393         | ng/mL |
| TNFR1A         | 11%             | 13%         |  | 0,025      | 68          | ng/mL |
| Troy           | 15%             | 14%         |  | 0,044      | 87          | ng/mL |
| RAGE           | 9%              | 10%         |  | 0,019      | 85          | ng/mL |
| VEGFR1         | 13%             | 12%         |  | 0,38       | 195         | ng/mL |
| NTProCNP       | 11%             | 12%         |  | 0,003      | 9           | ng/mL |
| WAP4C          | 14%             | 14%         |  | 0,16       | 130         | ng/mL |
| ANP propeptide | 29%             | 28%         |  | 1600       | 110000      | pg/mL |
| D-Dimer        | 9%              | 10%         |  | 0,028      | 26          | ug/mL |
| ESAM           | 9%              | 9%          |  | 0,5        | 110         | ng/mL |
| GDF-15         | 9%              | 10%         |  | 0,014      | 6,4         | ng/mL |
| Angiogenin     | 18%             | 18%         |  | 170        | 40000       | ng/mL |
| CRP            | 17%             | 16%         |  | 0,065      | 33          | ug/mL |
| NGAL           | 19%             | 21%         |  | 7,5        | 1500        | ng/mL |

| Biomarker | Low cut off | high cut off | Inter assay coefficient of variation (%) |
|-----------|-------------|--------------|------------------------------------------|
| IL-6      | 0.10        | 0.88         | 13                                       |
| cTNI      | 0.20        | 1000         | 10                                       |
| ET1       | 0.5         | 250          | 7                                        |

BG

medicine

|            | Total Imprecision           |                             | Detection limit |      |      | Measuring range |
|------------|-----------------------------|-----------------------------|-----------------|------|------|-----------------|
|            | Intra-assay variability (%) | Intra-assay variability (%) | LoB             | LoD  | LoQ  |                 |
| Galectin-3 | 3,2                         | 5,6                         | 0,86            | 1,13 | 1,32 | 1,4-94,8        |

**Table S3. Logistic regression correcting for clinical confounders**

| <b>Marker</b>          | <b>Odds ratio(95%CI)</b> | <b>P-value</b>   |
|------------------------|--------------------------|------------------|
| Hs-CRP (doubling)      | 1.25 (1.08-1.46)         | <b>0.003</b>     |
| Model 1                | 1.29 (1.09-1.52)         | <b>0.003</b>     |
| Model 2                | 1.28 (1.08-1.51)         | <b>0.004</b>     |
| Pentraxin-3 (doubling) | 0.74 (0.56-0.98)         | <b>0.037</b>     |
| Model 1                | 0.81 (0.60-1.09)         | 0.165            |
| Model 2                | 0.83 (0.62-1.12)         | 0.212            |
| NT-proBNP (doubling)   | 0.75 (0.65-0.87)         | <b>&lt;0.001</b> |
| Model 1                | 0.68 (0.57-0.82)         | <b>&lt;0.001</b> |
| Model 2                | 0.74 (0.62-0.88)         | <b>0.001</b>     |
| proANP (doubling)      | 0.72 (0.58-0.89)         | <b>0.002</b>     |
| Model 1                | 0.66 (0.51-0.85)         | <b>0.001</b>     |
| Model 2                | 0.69 (0.54-.0.89)        | <b>0.004</b>     |
| VEGF (doubling)        | 1.09 (0.97-1.23)         | 0.159            |
| Model 1                | 1.03 (0.90-1.18)         | 0.639            |
| Model 2                | 1.05 (0.92-1.20)         | 0.442            |

**Model 1:** age, sex, eGFR, systolic blood pressure, a history of myocardial infarction; diabetes; atrial fibrillation and anemia

**Model 2:** Model 1+ ACE-inhibitors/ARB & Beta-blocker usage

Abbreviations: Hs-CRP, high-sensitive C-reactive protein; NT-proBNP, N-terminal pro-brain-type natriuretic peptide; Pro-ANP, pro-atrial-type natriuretic peptide; VEGF, vascular endothelial growth factor

**Table S4. Sensitivity analysis exclusive interactions**

|                  |         | HFpEF    |                  | HFrEF    |                  |
|------------------|---------|----------|------------------|----------|------------------|
| <i>Biomarker</i> |         | <i>R</i> | <i>p-value*</i>  | <i>R</i> | <i>p-value*</i>  |
| <b>HFpEF</b>     |         |          |                  |          |                  |
| IL6              | D-Dimer | 0.361    | 0.63             | 0.158    | 0.840            |
| Pentraxin-3      | VEGF    | -0.388   | 0.21             | -0.157   | 1.000            |
| Periostin        | VEGF    | -0.476   | <b>&lt;0.001</b> | -0.102   | 1.000            |
| NGAL             | PSAP-B1 | 0.381    | 0.21             | 0.147    | 1.000            |
| <b>HFrEF</b>     |         |          |                  |          |                  |
| NT-proBNP        | IL6     | 0.204    | 1.000            | 0.378    | <b>&lt;0.001</b> |
| NT-proBNP        | EPO-A   | 0.315    | 1.000            | 0.360    | <b>&lt;0.001</b> |

**\*corrected p-value**

Abbreviations: EPO-A, erythropoietin; HFpEF, heart failure with a preserved ejection fraction; HFrEF, heart failure with a reduced ejection fraction; IL-6, Interleukin 6; NGAL, neutrophil gelatinase-associated lipocalin; NT-proBNP, N-terminal pro-brain-type natriuretic peptide; PSAP, prostate-specific acid phosphatase; VEGF, vascular endothelial growth factor.

**Table S5. Relationship with outcome of biomarkers.**

|                                | HFrfEF (n = 364) |         | HFpEF (n = 96)   |              | p-value <sup>1</sup> | p-value <sup>2</sup> |
|--------------------------------|------------------|---------|------------------|--------------|----------------------|----------------------|
|                                | HR (95%CI)       | p-value | HR (95%CI)       | p-value      |                      |                      |
| <b>Inflammation</b>            |                  |         |                  |              |                      |                      |
| hs-CRP, (doubling)             | 0.98 (0.88-1.08) | 0.684   | 1.00 (0.77-1.30) | 0.982        | 0.615                | 0.638                |
| Pentraxin-3, (doubling)        | 0.89 (0.71-1.12) | 0.336   | 1.14 (0.73-1.77) | 0.569        | 0.074                | 0.277                |
| GDF-15, (doubling)             | 1.09 (0.81-1.48) | 0.563   | 2.06 (1.16-3.65) | <b>0.014</b> | 0.180                | 0.064                |
| RAGE, (doubling)               | 1.05 (0.86-1.28) | 0.629   | 1.34 (0.90-1.98) | 0.147        | 0.174                | 0.451                |
| Interleukin 6, (doubling)      | 1.00 (0.87-1.16) | 0.943   | 1.68 (1.14-2.48) | <b>0.008</b> | 0.136                | <b>0.014</b>         |
| TNF- $\alpha$ , (doubling)     | 1.01 (0.96-1.06) | 0.707   | 0.97 (0.88-1.07) | 0.580        | 0.282                | 0.610                |
| TNF- $\alpha$ -R1a, (doubling) | 1.31 (0.99-1.73) | 0.057   | 1.47 (0.90-2.39) | 0.120        | 0.666                | 0.653                |
| <b>Oxidative stress</b>        |                  |         |                  |              |                      |                      |
| MPO, (doubling)                | 0.89 (0.74-1.08) | 0.243   | 1.12 (0.70-1.79) | 0.644        | 0.505                | 0.276                |
| <b>Remodelling</b>             |                  |         |                  |              |                      |                      |
| Syndecan-1, (doubling)         | 1.01 (0.82-1.24) | 0.955   | 1.38 (0.99-1.93) | 0.059        | 0.244                | 0.163                |
| Periostin, (doubling)          | 1.03 (0.80-1.33) | 0.824   | 1.17 (0.76-1.79) | 0.485        | 0.798                | 0.849                |
| Galectin-3, (doubling)         | 0.86 (0.59-1.25) | 0.425   | 2.57 (1.19-5.53) | <b>0.016</b> | <b>0.070</b>         | <b>0.026</b>         |
| ST-2, (doubling)               | 0.98 (0.86-1.11) | 0.694   | 1.27 (0.96-1.67) | 0.092        | 0.268                | 0.219                |
| Osteopontin, (doubling)        | 0.90 (0.72-1.14) | 0.398   | 1.60 (0.98-2.62) | 0.062        | <b>0.004</b>         | <b>0.009</b>         |
| TGF- $\beta$ , (doubling)      | 1.01 (0.91-1.13) | 0.834   | 1.07 (0.89-1.28) | 0.465        | 0.702                | 0.466                |
| <b>Cardiomyocyte stretch</b>   |                  |         |                  |              |                      |                      |
| NT-proBNP, (doubling)          | 1.28 (1.14-1.43) | <0.001  | 1.42 (1.10-1.84) | 0.007        | 0.417                | 0.605                |
| proANP, (doubling)             | 1.02 (0.82-1.27) | 0.840   | 1.23 (0.85-1.76) | 0.268        | 0.364                | 0.437                |
| TnI, (doubling)                | 1.16 (1.06-1.28) | 0.001   | 1.07 (0.86-1.33) | 0.532        | 0.347                | 0.269                |
| <b>Angiogenesis</b>            |                  |         |                  |              |                      |                      |
| VEGF, (doubling)               | 0.88 (0.81-0.96) | 0.004   | 1.13 (0.88-1.47) | 0.326        | 0.273                | 0.080                |
| VEGFR (doubling)               | 1.19 (0.94-1.51) | 0.156   | 1.37 (0.93-2.01) | 0.106        | 0.918                | 0.603                |
| Angiogenin, (doubling)         | 0.89 (0.74-1.06) | 0.195   | 0.67 (0.47-0.95) | <b>0.026</b> | 0.139                | 0.156                |
| NT-proCNP, (doubling)          | 0.96 (0.73-1.25) | 0.749   | 1.69 (1.15-2.49) | <b>0.007</b> | 0.232                | <b>0.042</b>         |
| Neuropilin-1 (doubling)        | 1.12 (0.85-1.48) | 0.425   | 2.34 (1.40-3.90) | <b>0.001</b> | <b>0.017</b>         | <b>0.024</b>         |
| <b>Arteriosclerosis</b>        |                  |         |                  |              |                      |                      |
| ESAM, (doubling)               | 1.35 (0.79-2.29) | 0.268   | 1.77 (0.85-3.71) | 0.127        | 0.571                | 0.528                |
| <b>Renal function</b>          |                  |         |                  |              |                      |                      |
| NGAL, (doubling)               | 0.95 (0.69-1.29) | 0.729   | 0.84 (0.46-1.53) | 0.569        | 0.702                | 0.884                |
| BUN, (doubling)                | 0.91 (0.63-1.33) | 0.632   | 1.03 (0.49-2.19) | 0.929        | 0.673                | 0.816                |
| <b>Haematopoiesis</b>          |                  |         |                  |              |                      |                      |
| EPOa, (doubling)               | 1.09 (0.96-1.24) | 0.197   | 1.27 (1.00-1.62) | 0.049        | 0.745                | 0.129                |
| <b>Other</b>                   |                  |         |                  |              |                      |                      |
| D-Dimer, (doubling)            | 1.09 (0.97-1.22) | 0.132   | 1.31 (0.99-1.75) | 0.056        | 0.452                | 0.331                |
| WAP4C (doubling)               | 1.18 (0.93-1.50) | 0.164   | 1.61 (1.09-2.37) | 0.016        | 0.413                | 0.181                |
| Mesothelin, (doubling)         | 1.19 (0.88-1.61) | 0.258   | 0.93 (0.46-1.89) | 0.841        | 0.569                | 0.803                |
| PIGR (doubling)                | 1.03 (0.79-1.34) | 0.825   | 1.79 (1.13-2.83) | 0.013        | 0.207                | 0.101                |
| PSAP (doubling)                | 1.24 (0.96-1.59) | 0.099   | 1.26 (0.79-2.01) | 0.324        | 0.786                | 0.844                |
| ET-1, (doubling)               | 1.30 (0.93-1.80) | 0.120   | 0.99 (0.46-2.13) | 0.972        | 0.746                | 0.859                |
| TROY (doubling)                | 0.98 (0.73-1.31) | 0.868   | 1.63 (1.05-2.54) | 0.030        | 0.351                | 0.101                |

1. Univariable interaction p-value
2. Multivariable interaction p-value

Abbreviations: BUN, blood urea nitrogen; cTNI, cardiac troponin-I; EPOa, erythropoietin; ESAM, endothelial cell-selective adhesion molecule; ET-1, endothelin-1; GDF-15, growth differentiation factor 15; HFREF, heart failure with a reduced ejection fraction ; HFpEF, heart failure with a preserved ejection fraction; hs-CRP, high-sensitive C-reactive protein; IL-6, Interleukin 6; MPO, myeloperoxidase; NGAL, neutrophil gelatinase-associated lipocalin; NT-proBNP, N-terminal pro-brain-type natriuretic peptide; NT-proCNP, amino terminal pro-C-type natriuretic peptide; PIGR, polymeric immunoglobulin receptor; Pro-ANP, pro-atrial-type natriuretic peptide; PSAP, prostate-specific acid phosphatase; RAGE, receptor of advanced glycation end-products; TGF-b, transforming growth factor beta; TNF-a, tumor necrosis factor alpha; TNF-aR1a, tumor necrosis factor alpha receptor 1a; VEGF, vascular endothelial growth factor; VEGFR, vascular endothelial growth factor receptor; WAP4C, WAP 4 disulfide core domain protein;

Figure S1. PCA analysis

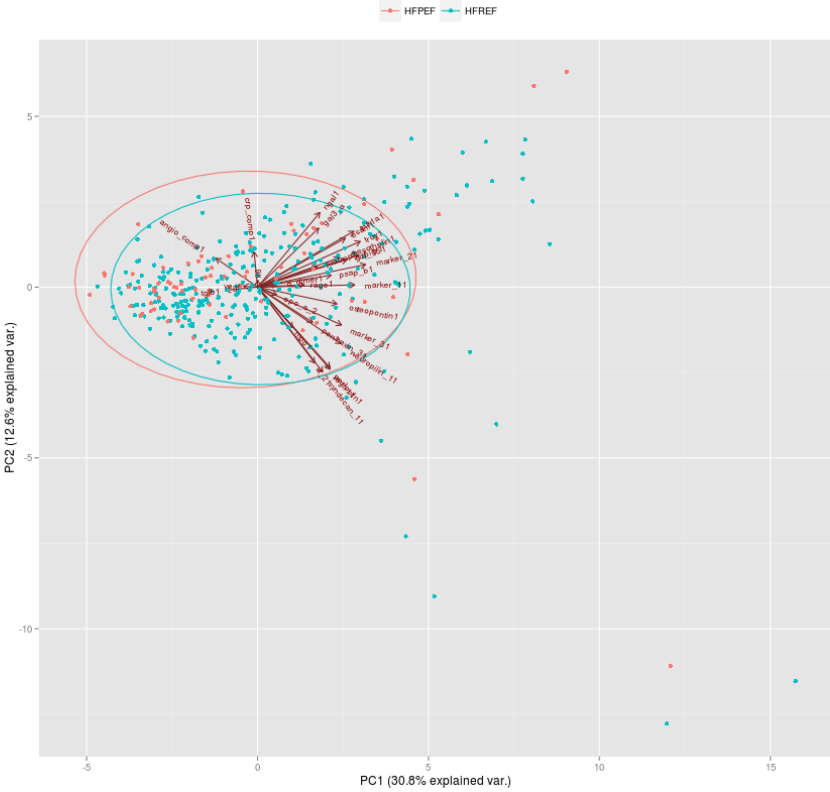

**Principal Component Analysis** – PCA plot illustrating the first two principal components, collectively accounting for 43.4% (PC1 accounting for 30.8%, and PC2 for 12.6%) of the overall variance in the combined HFpEF and HFrEF biomarker measurements. The PCA was performed using HFpEF and HFrEF as categorical variables, where biomarker levels are displayed as red and blue for patients with HFpEF and HFrEF respectively.



Figure S2. Survival stratified according to HFrEF and HFpEF

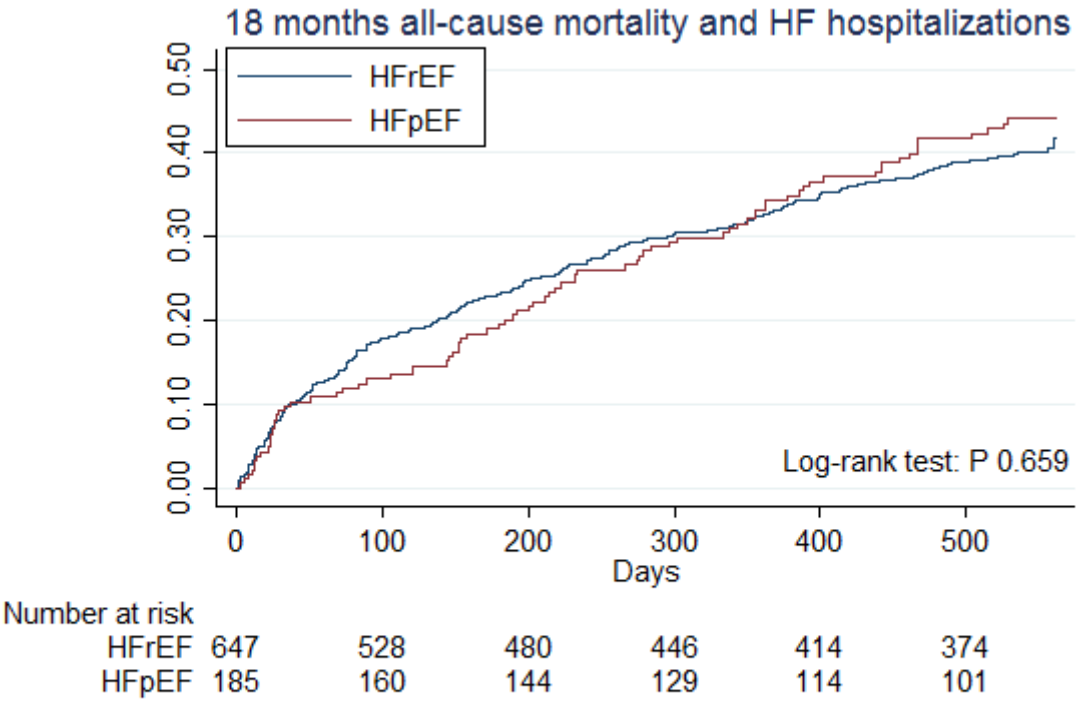

**Figure S3. Osteopontin in HFrEF and HFpEF for HF related hospitalizations at 18 months.**

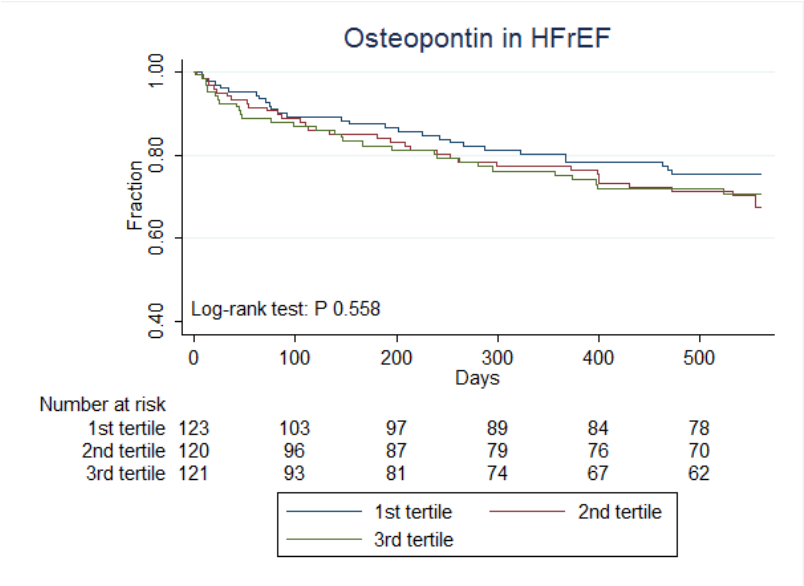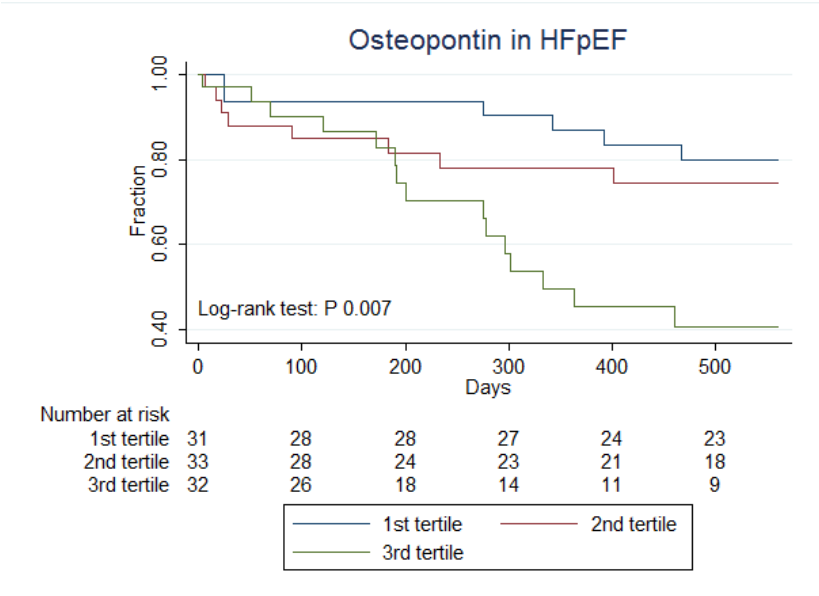

**Figure S4. Osteopontin in HFrEF and HFpEF for all-cause mortality at 18 months.**

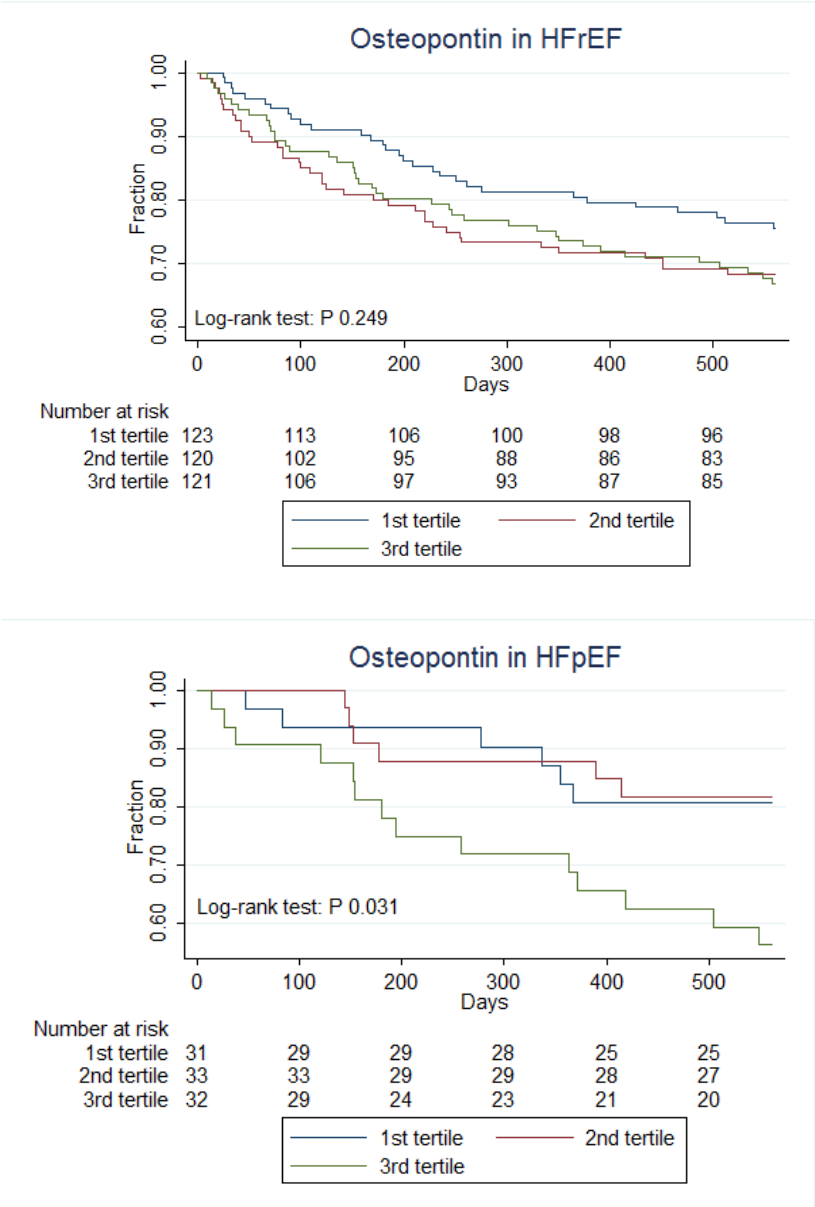

**Figure S5. Neuropilin in HFReEF and HFpEF for HF related hospitalizations at 18 months.**

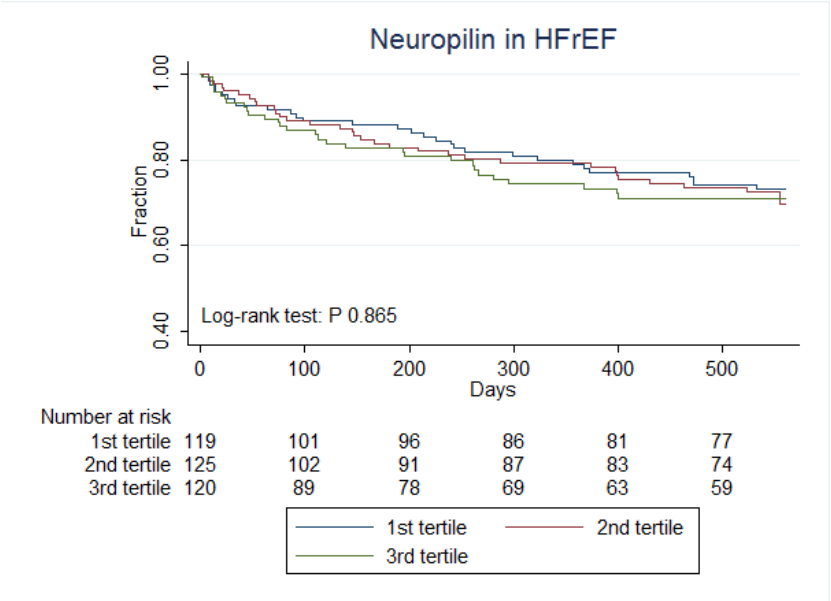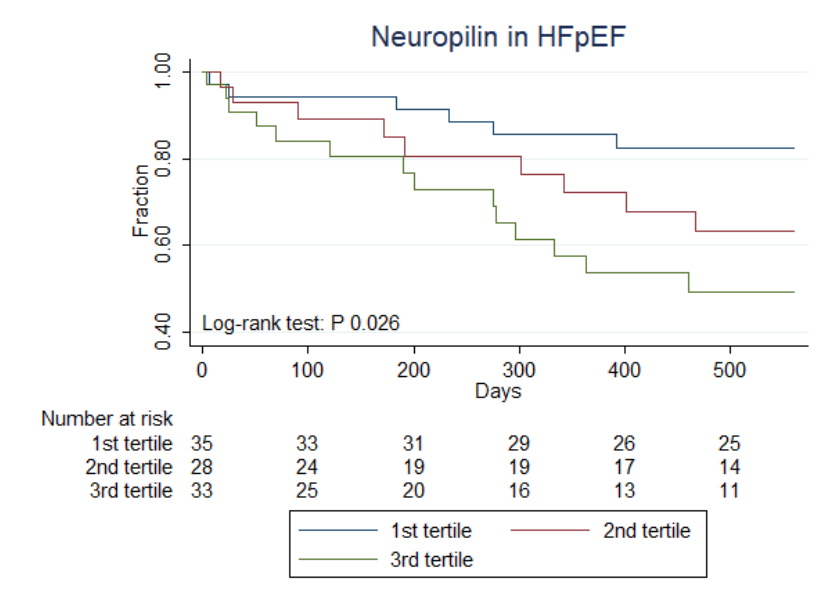

**Figure S6. Neuropilin in HFrEF and HFpEF for all-cause mortality at 18 months.**

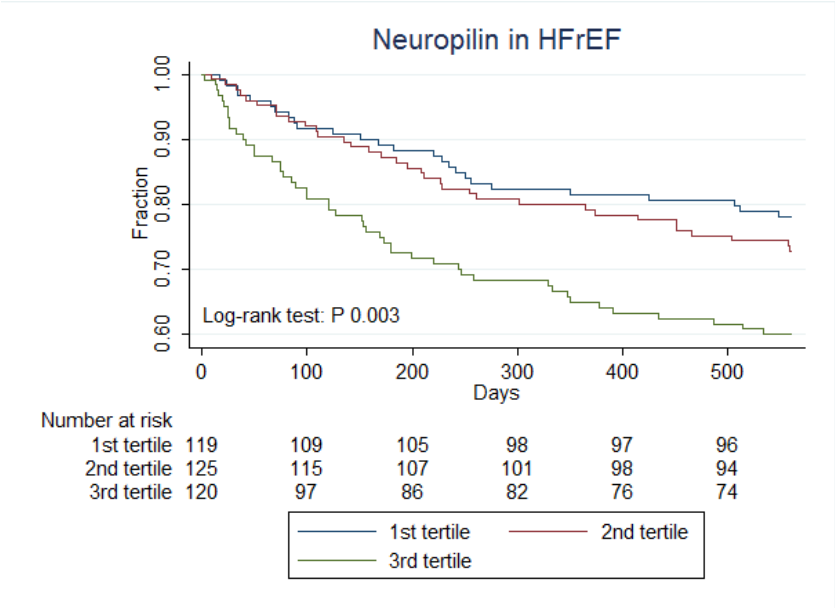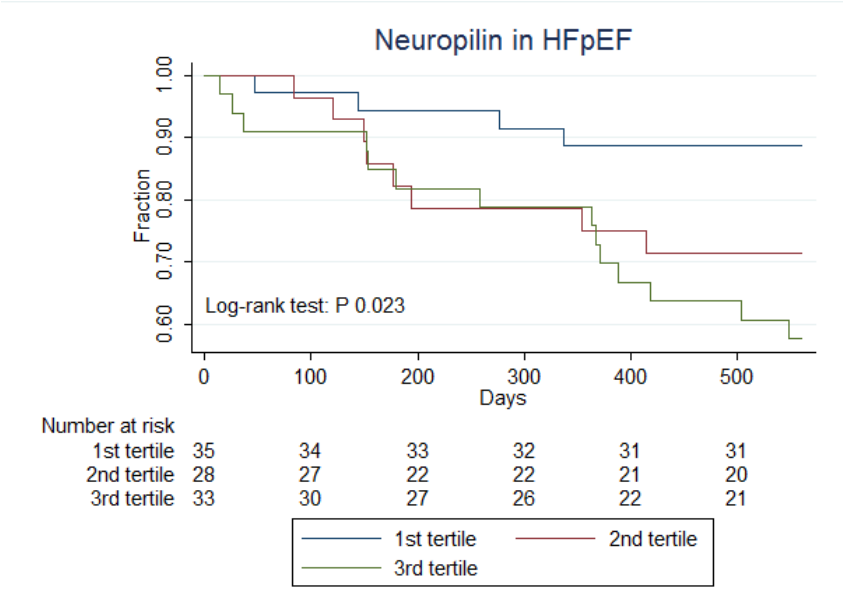

Supplement: JAH3-6-e003989-s001.pdf [file JAH3-6-e003989-s001.pdf]
